# Supplementary material
Source: PubMed Central journal article supplement (PMC3518442)
Supplement: NIHMS411691-supplement-1_si_002.pdf [file NIHMS411691-supplement-1_si_002.pdf]

| Time<br>[Day] | Cumulative Release of SCC22<br>[µg of drug per mg of nanoparticles] | Standard Error of Mean<br>[µg of drug per mg of nanoparticles] |
|---------------|---------------------------------------------------------------------|----------------------------------------------------------------|
| 0.5           | 3.7                                                                 | 0.43                                                           |
| 1             | 16.73                                                               | 7.17                                                           |
| 2             | 33.45                                                               | 14.02                                                          |
| 3             | 58.8                                                                | 6.11                                                           |

N = 3 for all time points.
